# Supplementary material for: Functional consequences of C-terminal mutations in RUNX2
Source: PubMed Central journal article supplement (PMC10374887; doi:10.1038/s41598-023-39293-1), 2023-07-27
Supplement: 41598_2023_39293_MOESM1_ESM.pdf [file 41598_2023_39293_MOESM1_ESM.pdf]

## SUPPLEMENTARY DATA

### Functional Consequences of C-Terminal Mutations in *RUNX2*

Sermporn Thaweesapphithak<sup>1,2</sup>, Thanakorn Theerapanon<sup>1</sup>, Khanti Rattanapornsompong<sup>1</sup>, Narin Intarak<sup>1</sup>, Pimsiri Kanpittaya<sup>3</sup>, Vorapat Trachoo<sup>4</sup>, Thantrira Porntaveetus<sup>1,5\*</sup>, Vorasuk Shotelersuk<sup>6,7</sup>

<sup>1</sup>Center of Excellence in Genomics and Precision Dentistry, Department of Physiology, Faculty of Dentistry, Chulalongkorn University, Bangkok, Thailand

<sup>2</sup>Graduate Program in Oral Biology, Faculty of Dentistry, Chulalongkorn University, Bangkok, Thailand.

<sup>3</sup>Department of Orthodontics, Faculty of Dentistry, Chulalongkorn University, Bangkok, Thailand

<sup>4</sup>Department of Oral and Maxillofacial Surgery, Faculty of Dentistry, Chulalongkorn University, Bangkok, Thailand

<sup>5</sup>Graduate Program in Geriatric and Special Patients Care, Faculty of Dentistry, Chulalongkorn University, Bangkok, Thailand.

<sup>6</sup>Center of Excellence for Medical Genomics, Medical Genomics Cluster, Department of Pediatrics, Faculty of Medicine, Chulalongkorn University, Bangkok, Thailand

<sup>7</sup>Excellence Center for Genomics and Precision Medicine, King Chulalongkorn Memorial Hospital, the Thai Red Cross Society, Bangkok, Thailand

|                                |         |                 |        |         |                |
|--------------------------------|---------|-----------------|--------|---------|----------------|
|                                | Arg131  | Pro279          | Asp287 | Thr420  |                |
|                                | ↓       | ↓               | ↓      | ↓       |                |
| <i>Homo sapiens</i>            | SHWRCNK | PFNPQGQSQITDPRQ |        | HYHTYLP | NP_001019801.3 |
| <i>Mus musculus</i>            | SHWRCNK | PFNPQGQSQITDPRQ |        | ---TVPA | XP_006523603.1 |
| <i>Danio rerio</i>             | SHWRCNK | SFNPQGQTQISDPRQ |        | HYHTYLP | NP_998023.1    |
| <i>Rattus norvegicus</i>       | SHWRCNK | PFNPQGQSQITDPRQ |        | HYHTYLP | XP_006244611.1 |
| <i>Caenorhabditis elegans</i>  | KHWRSNK | SF-----         |        | IFIT--- | NP_491679.1    |
| <i>Xenopus tropicalis</i>      | SHWRCNK | PFNPQGQSQIADPRQ |        | HYHTYLP | NP_001128588.1 |
| <i>Drosophila melanogaster</i> | NHWRSNK | AGQP--AAMMPSPG  |        | -----   | NP_001285501.1 |

**Fig S1. Amino acid conservations of p.Arg131, Pro279, Asp287, and Thr420 among several species.**

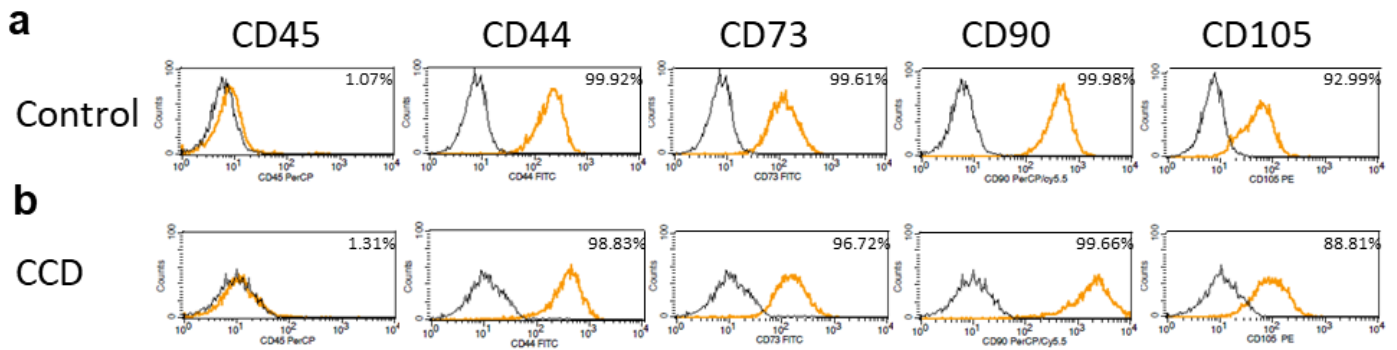

**Fig S2. Flow cytometric analysis of aBMSCs marker expression. a, b. CCD and control cells were positive for CD44, CD73, CD90, and CD105, but negative for CD45.**

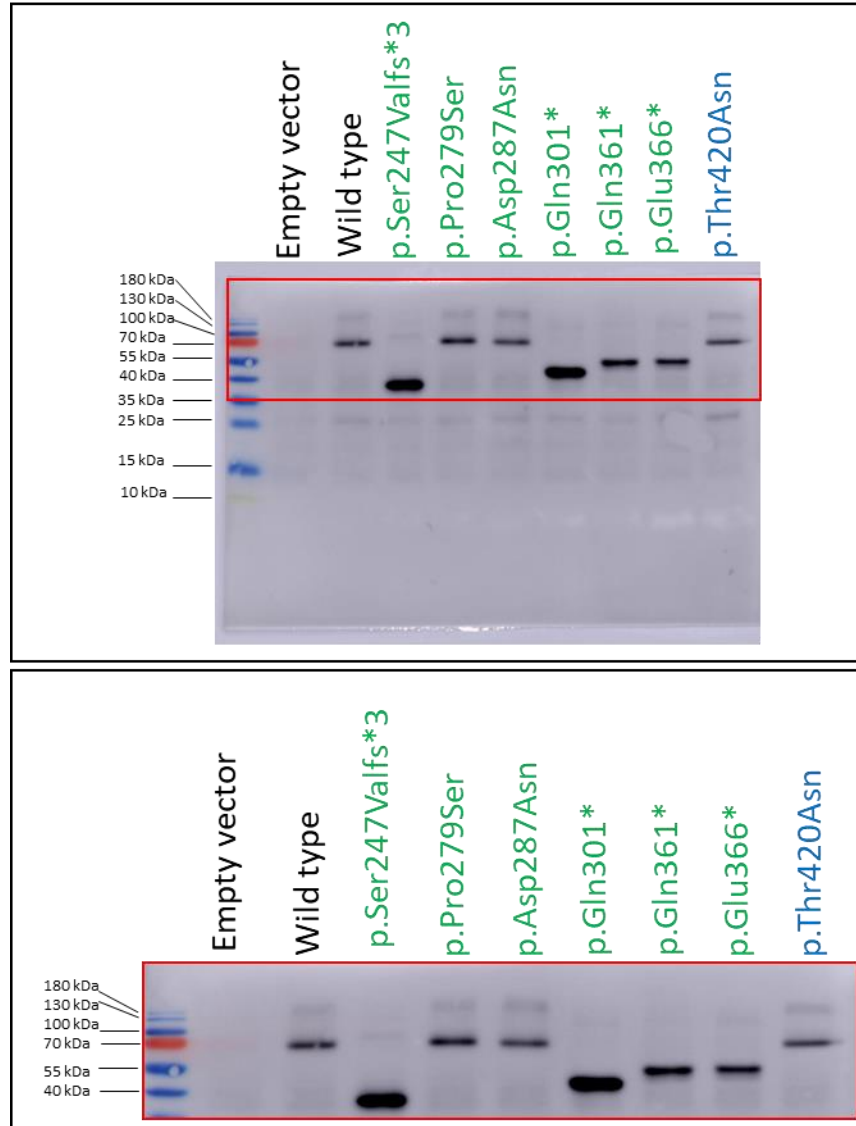

**Fig S3. Full length blot of RUNX2 expression in empty, wildtype, and mutants (p.Ser247Valfs\*3, p.Pro279Ser, p.Asp287Asn, p.Gln301\*, p.Gln361\*, p.Glu366\*, and p.Thr420Asn) vectors transfected in HEK293 cells. Red boxes indicate the cropped blot shown in Figure 1c.**

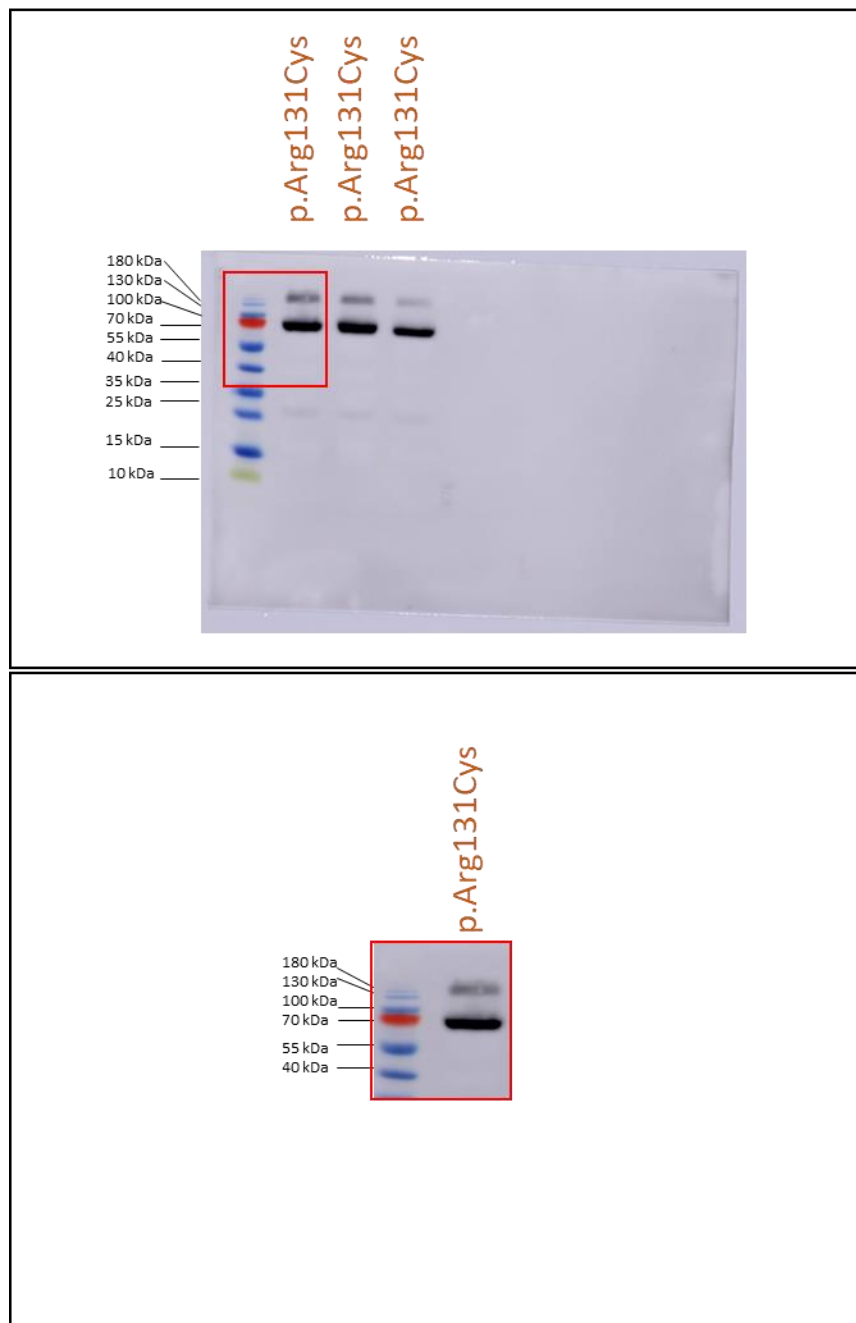

**Fig S4. Full length blot of RUNX2 expression in mutants (p.Arg131Cys) vectors transfected in HEK293 cells. Red boxes indicate the cropped blot shown in Figure 1c.**

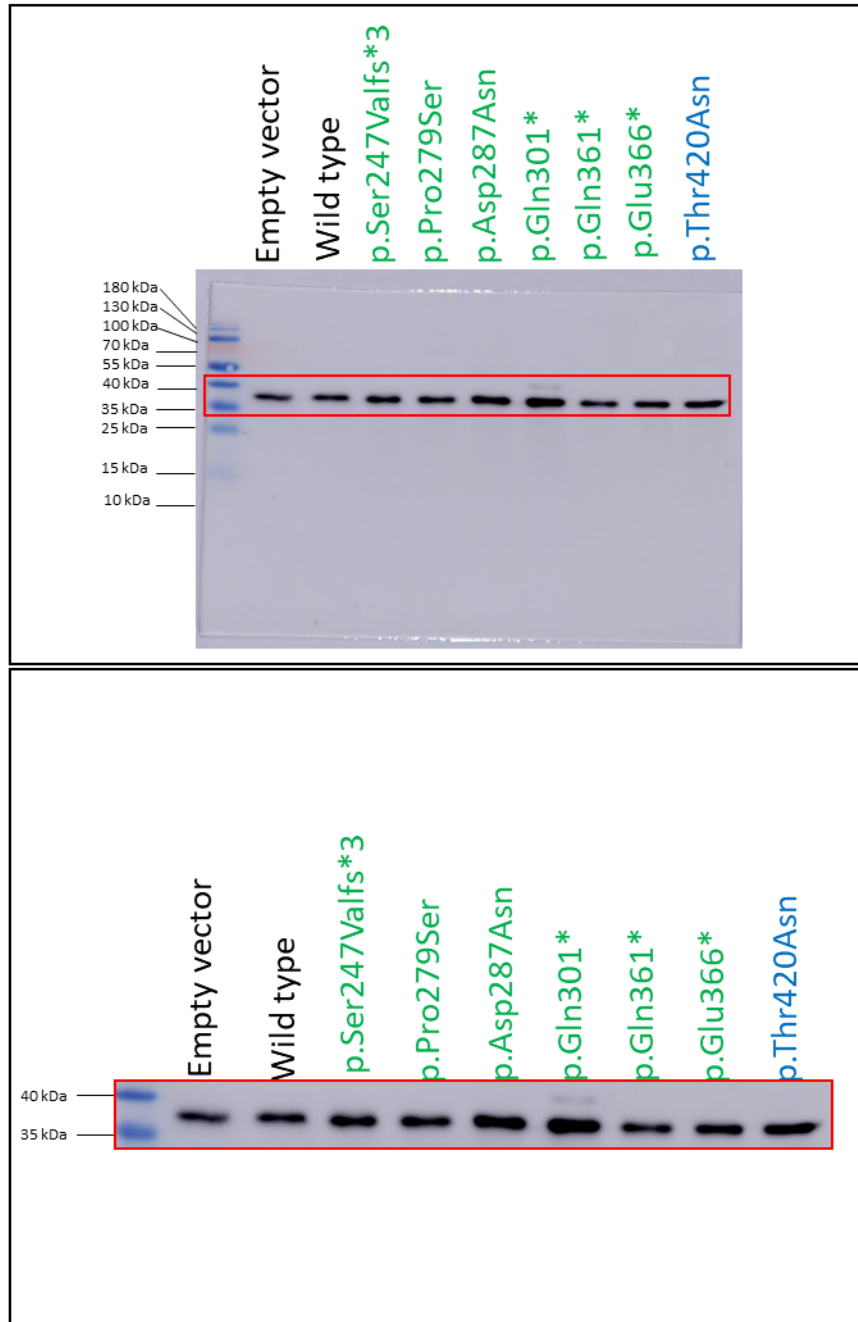

**Fig S5. Full length blot of GAPDH expression in empty, wildtype, and mutants (p.Ser247Valfs\*3, p.Pro279Ser, p.Asp287Asn, p.Gln301\*, p.Gln361\*, p.Glu366\*, and p.Thr420Asn) vectors transfected in HEK293 cells. Red boxes indicate the cropped blot shown in Figure 1c.**

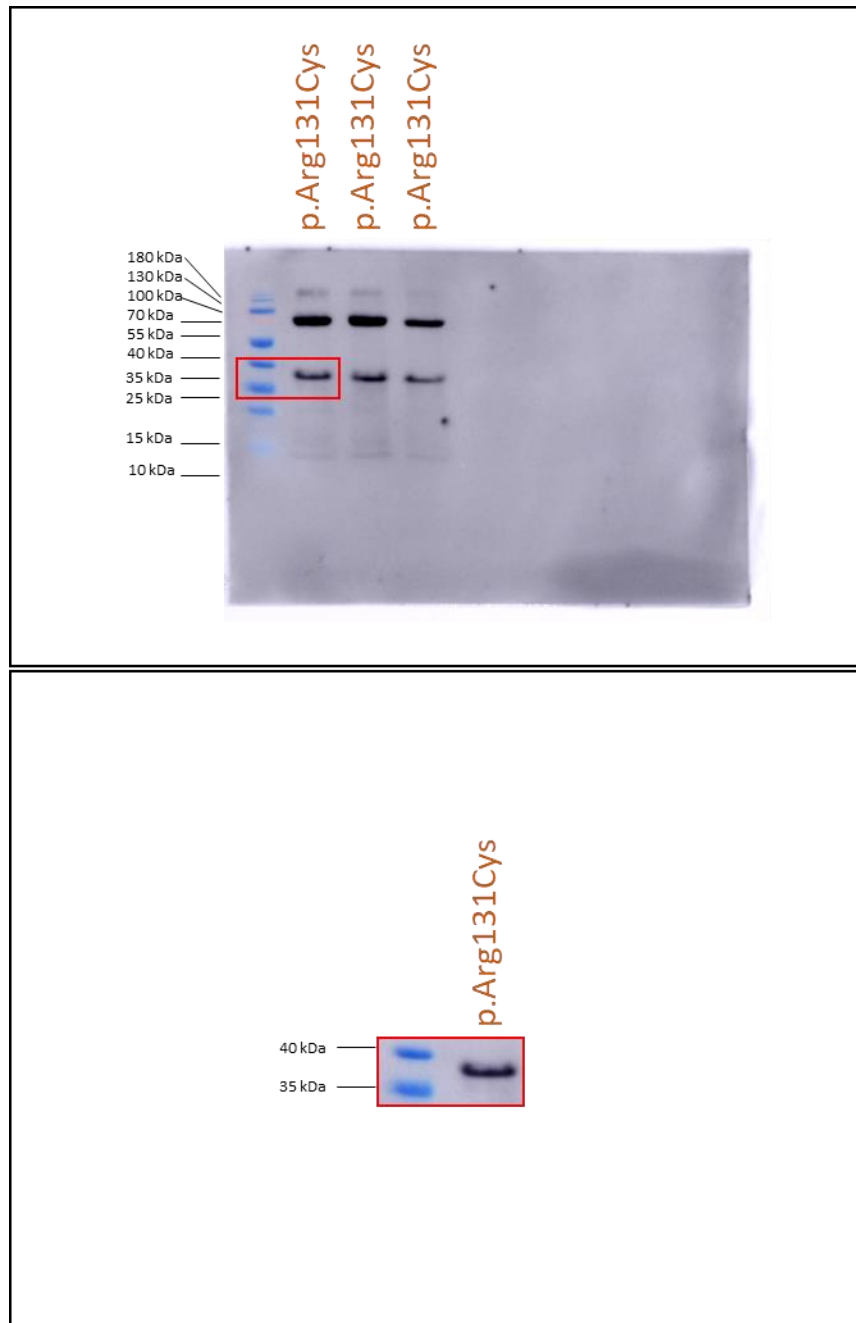

**Fig S6. Full length blot of GAPDH expression in mutants (p.Arg131Cys) vectors transfected in HEK293 cells. Red boxes indicate the cropped blot shown in Figure 1c.**

**Table S1. Primers used for site-directed mutagenesis.**

| <b>Variants</b>              | <b>Primers</b>    | <b>Sequence 5'&gt; 3'</b>                           | <b>Annealing temperature [°C]</b> |
|------------------------------|-------------------|-----------------------------------------------------|-----------------------------------|
| c.A739del<br>p.Ser247Valfs*3 | Forward<br>Reward | TCTCTGACCGCCTCGTGATTTAGGGC<br>GC GAGGCGGTCAGAGAACAA | 60.6                              |
| c.835C>T<br>p.Pro279Ser      | Forward<br>Reward | TCCTTTTAATTCACAAGGACAGAG<br>CTTGGTGCAGAGTTCAGG      | 53.0                              |
| c.859G>A<br>p.Asp287Asn      | Forward<br>Reward | TCAGATTACAAACCCAGGCA<br>CTCTGTCCTTGTGGATTAAGG       | 54.9                              |
| c.901C>T<br>p.Gln301*        | Forward<br>Reward | GTCCTATGACTAGTCTTACCCCTCC<br>CACGGCGGGGAAGACTGT     | 58.5                              |
| c.1081C>T<br>p.Gln361*       | Forward<br>Reward | TAAGAAGAGCTAGGCAGGTGC<br>CTGAGAGTGGAAGGCCAG         | 56.0                              |
| c.1096 G>T<br>p.Glu366*      | Forward<br>Reward | AGGTGCTTCATAACTGGGCCC<br>GCCTGGCTCTTCTTACTG         | 55.5                              |
| c.1259C>A<br>p.Thr420Asn     | Forward<br>Reward | CACTACCACAACTACCTGCCA<br>AGTGGTGGCGGACATACC         | 57.0                              |

**Table S2. Primers used for Sanger sequencing to validate the mutagenesis.**

| <b>Primer</b>     | <b>Sequence 5'&gt; 3'</b>                   | <b>Annealing temperature [°C]</b> |
|-------------------|---------------------------------------------|-----------------------------------|
| Forward<br>Reward | GCGCATTCTCATCCCAGTA<br>GGCTCAGGTAGGAGGGGTAA | 60                                |

**Table S3. Primers used for Sanger sequencing of the alveolar bone mesenchymal stem cells (aBMSC) obtained from the CCD patient harboring the p.Ser247Valfs\*3 mutation.**

| Primer  | Sequence 5'> 3'      | Annealing temperature [°C] |
|---------|----------------------|----------------------------|
| Forward | TGGCCACCAGATACCGCTTA | 60                         |
| Reward  | ATAAGCCGCTTCACAGCTCC |                            |

**Table S4. Primers used for real-time PCR.**

| Genes          | Primers | Primer Sequence (5' > 3')      | Annealing temperature [°C] |
|----------------|---------|--------------------------------|----------------------------|
| <i>ALP</i>     | Forward | CGA GAT ACA AGC ACT CCC ACT TC | 60                         |
|                | Reverse | CTG TTC AGC TCG TAC TGC ATG TC |                            |
| <i>COL1A1</i>  | Forward | CTG GCA AAG AAG GCG GCA AA     | 60                         |
|                | Reverse | CTC ACC ACG ATC ACC ACT CT     |                            |
| <i>OCN</i>     | Forward | CTT TGT GTC CAA GCA GGA GG     | 60                         |
|                | Reverse | CTG AAA GCC GAT GTG GTC AG     |                            |
| <i>RUNX2</i>   | Forward | ATG ATG ACA CTG CCA CCT CTG A  | 60                         |
|                | Reverse | ATG GAG GGC GGA TTG GAA A      |                            |
| <i>β-actin</i> | Forward | TGG AAC GGT GAA GGT GAC AG     | 60                         |
|                | Reverse | AAC AAC GCA TCT CAT ATT TGG AA |                            |
